# Supplementary material
Source: Springer Nature journal article supplement (https://www.springermedizin.de/resource/supplementary/13075_2009_2777_MOESM5_ESM.pdf/9692860)

**A****MMP-1 protein release**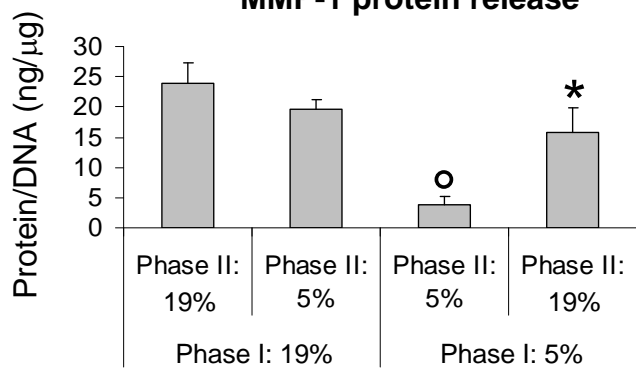**B****MMP-13 protein release**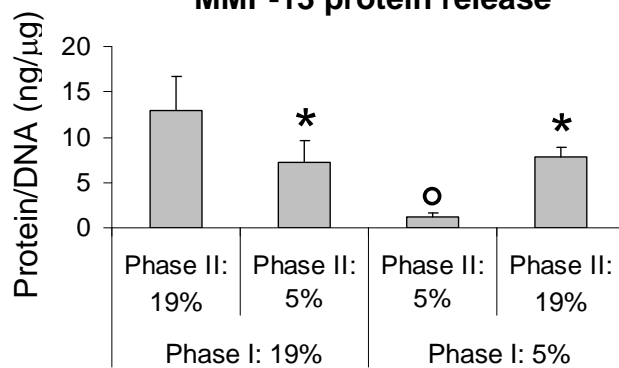**C****Type II collagen fragments**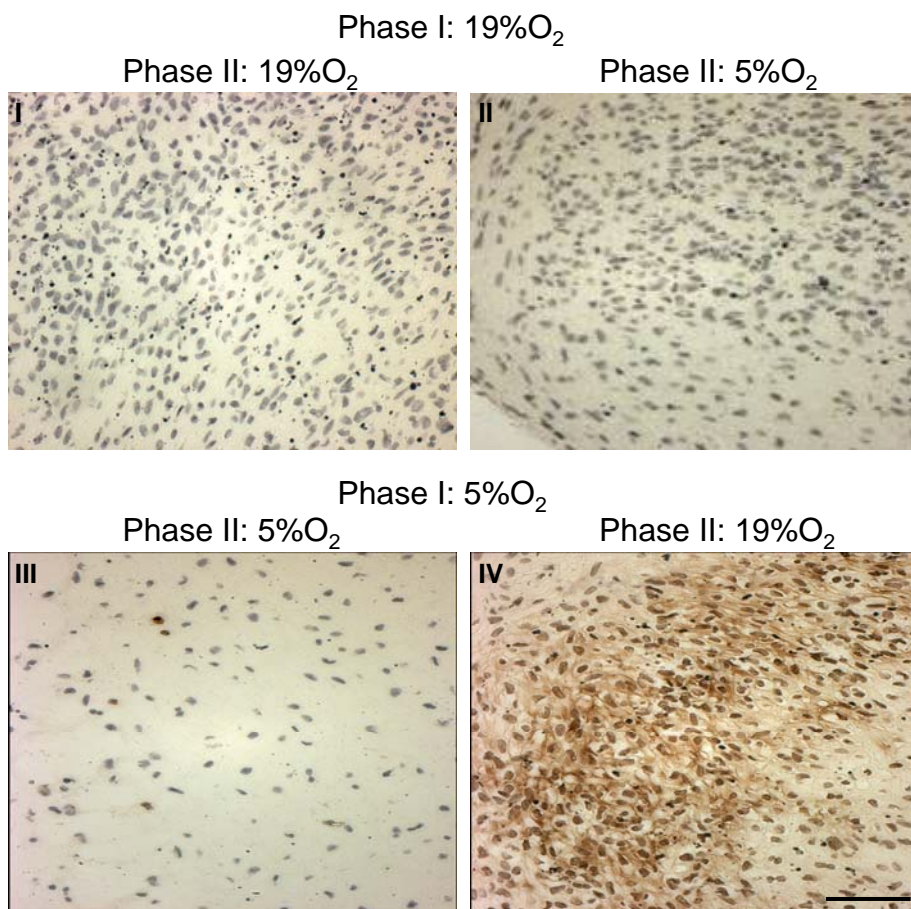

Supplement: MOESM5 [file 9692860]
